# Supplementary material
Source: HighWire-hosted journal article supplement (https://www.ajnr.org/highwire/filestream/52433/field_highwire_adjunct_files/0/3606_table.pdf)
Supplement: 3606_table.pdf [file 3606_table.pdf]

**Online Table: Patient symptoms and lesion evaluation**

| Subject      | Age, y/Sex | Site       | Reason for Exam        | Exam Findings <sup>a</sup> | Plaque Area, mm <sup>2</sup> | Plaque Area, % | Quantitative IPE | IPE Scores             |
|--------------|------------|------------|------------------------|----------------------------|------------------------------|----------------|------------------|------------------------|
| Symptomatic  |            |            |                        |                            |                              |                |                  |                        |
| 1            | 57/M       | SUP R ICA  | Suspected TIA          | L UE/LE WE, FP             | 17.7                         | 84.9%          | 1.94             | Enhancing<br>Yes (5/5) |
| 2            | 60/M       | A2 AZG ACA | Suspected TIA          | DWI POS                    | 11.2                         | 84.7%          | 1.78             | Yes (5/5)              |
| 3            | 80/F       | BA         | Suspected TIA          | VE, DYS, TIN, DIP          | 7.5                          | 81.1%          | 1.45             | Yes (4/4)              |
| 4            | 83/F       | A2 L ACA   | Suspected TIA          | DWI POS                    | 4.0                          | 92.6%          | 1.75             | Yes (4/4)              |
| 5            | 58/F       | BA         | Suspected TIA          | DWI POS                    | 8.8                          | 93.1%          | 1.95             | Yes (4/4)              |
| 6            | 46/M       | BA         | Suspected TIA          | DYS, ATX, VE               | 18.3                         | 93.2%          | 1.40             | Yes (4/3)              |
| 7            | 74/M       | BA         | Suspected TIA          | DWI POS                    | 18.8                         | 93.3%          | 1.90             | Yes (3/4)              |
| 8            | 69/M       | BA         | Suspected TIA          | DWI POS                    | 13.3                         | 91.6%          | 1.44             | No (2/2)               |
| 9            | 64/M       | BA         | Suspected TIA          | DWI POS                    | 7.5                          | 91.7%          | 1.49             | No (1/2)               |
| 10           | 76/M       | BA         | Suspected TIA          | DWI POS                    | 21.3                         | 91.2%          | 1.15             | No (2/2)               |
| Total, %     |            |            |                        |                            | 12.8 ± 5.9 mm <sup>2</sup>   | 89.7 ± 4.0%    | 1.63 ± 0.27      | 7 (70%)                |
| Asymptomatic |            |            |                        |                            |                              |                |                  |                        |
| Nonenhancing |            |            |                        |                            |                              |                |                  |                        |
| 11           | 76/F       | A2 L ACA   | Suspected TIA          | None                       | 5.1                          | 88.9%          | 1.05             | No (2/3)               |
|              |            | SUP L ICA  |                        |                            | 11.1                         | 78.9%          | 1.22             | No (2/3)               |
| 12           | 68/F       | SUP R ICA  | Suspected TIA          | None                       | 8.8                          | 93.1%          | 1.35             | No (2/3)               |
| 13           | 60/M       | BA         | Suspected TIA          | None                       | 13.8                         | 89.5%          | 1.06             | No (2/3)               |
| 14           | 75/M       | BA         | Hx of stroke/follow-up | None                       | 17.3                         | 85.2%          | 1.16             | No (2/2)               |
| 15           | 76/F       | A2 L ACA   | Suspected TIA          | None                       | 4.0                          | 84.7%          | 1.20             | No (2/2)               |
|              |            | V4 L VA    |                        |                            | 13.7                         | 86.0%          | 1.30             | No (2/2)               |
| 16           | 66/M       | SUP L ICA  | Hx of stroke/follow-up | None                       | 12.4                         | 94.9%          | 1.15             | No (2/3)               |
|              |            | BA         |                        |                            | 7.3                          | 91.3%          | 1.09             | No (2/2)               |
| 17           | 70/M       | V4 R VA    | Suspected TIA          | None                       | 7.4                          | 92.1%          | 1.18             | No (3/2)               |
| 18           | 66/M       | V4 L VA    | Hx of stroke/follow-up | None                       | 15.3                         | 76.4%          | 1.31             | No (2/2)               |
| 19           | 81/M       | BA         | Suspected TIA          | None                       | 10.5                         | 67.3%          | 1.72             | Yes (4/4)              |
| Total, %     |            |            |                        |                            | 10.8 ± 4.0 mm <sup>2</sup>   | 86.9 ± 6.1%    | 1.23 ± 0.18      | 11 (92%)               |

<sup>a</sup> Findings in vascular distribution distal to stenosed vessel.

**Note:**—L indicates left; R, right; AZG, azygous; UE, upper extremity; LE, lower extremity; WE, weakness; FP, face paresthesia; SUP, supraclinoid; Hx, history; POS, positive; VE, vertigo; DYS, dysarthria; TIN, tinnitus; DIP, diplopia; ATX, ataxia; BA, basilar artery; VA, vertebral artery.
